# Supplementary material for: Competition between plant and bacterial cells at the microscale regulates the dynamics of nitrogen acquisition in wheat (Triticum aestivum)
Source: PubMed Central journal article supplement (PMC3916831; doi:10.1111/nph.12405), 2013-07-12
Supplement: nph0200-0796-sd1.pdf [file nph0200-0796-sd1.pdf]

## Supporting Information Figs S1–S5

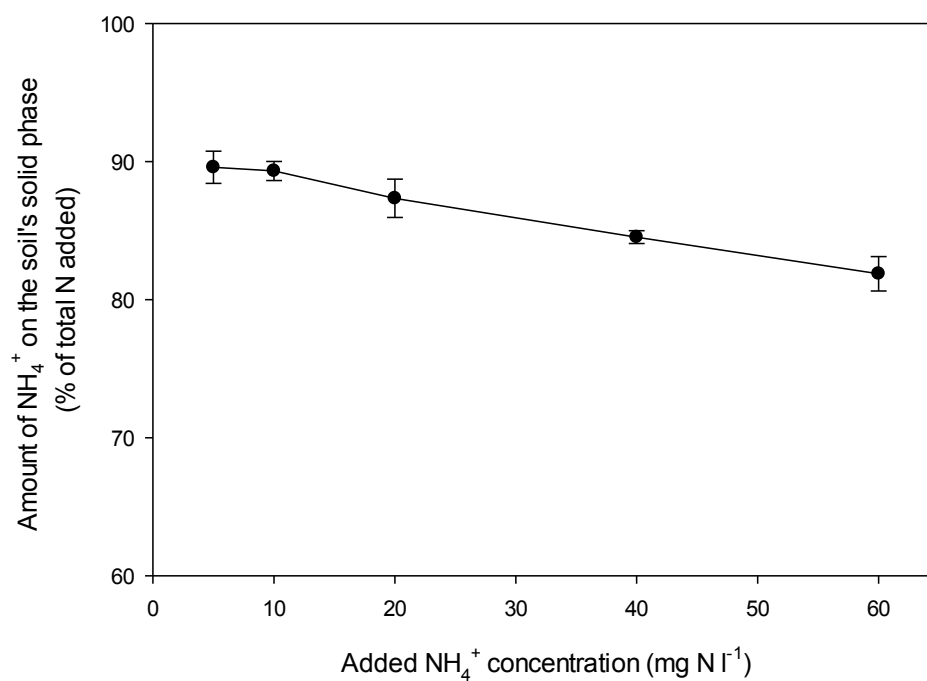

**Fig. S1** Amount of NH<sub>4</sub><sup>+</sup> held on the soil's solid phase as a function of solution NH<sub>4</sub><sup>+</sup> concentration. Values represent means  $\pm$  SEM ( $n = 3$ ).

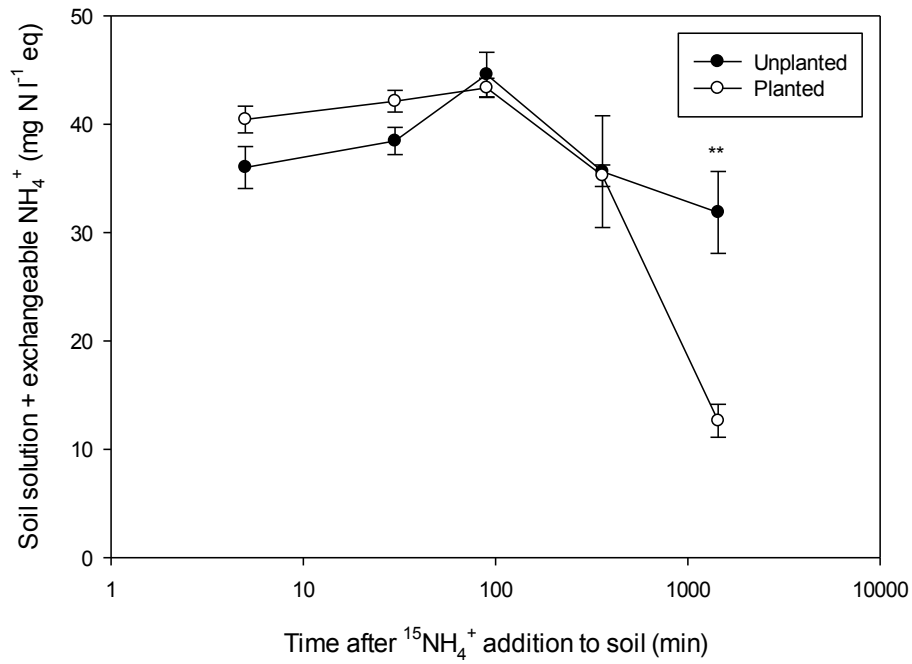

**Fig. S2** Total amount of  $^{15}\text{NH}_4^+$  present in soil solution and held on the soil's cation exchange phase in planted and unplanted microcosms to which  $^{15}\text{NH}_4$  was injected. Values represent means  $\pm$  SEM ( $n = 4$ ). \*\* indicate significant differences between the planted and unplanted treatments at the  $P < 0.01$  level.

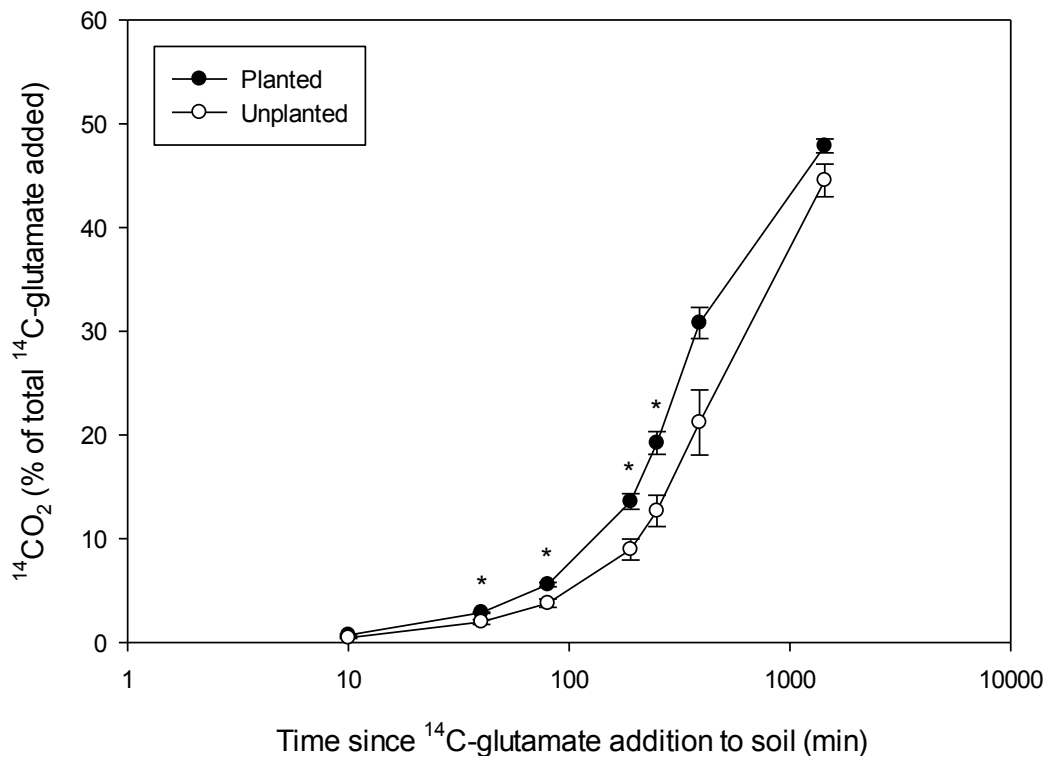

**Fig. S3** Time dependent mineralization of <sup>14</sup>C-labelled glutamate in soil in the presence and absence of wheat roots. Values represent means ± SEM (*n* = 4). \* indicate significant differences between the planted and unplanted treatments at the *P* < 0.05 level.

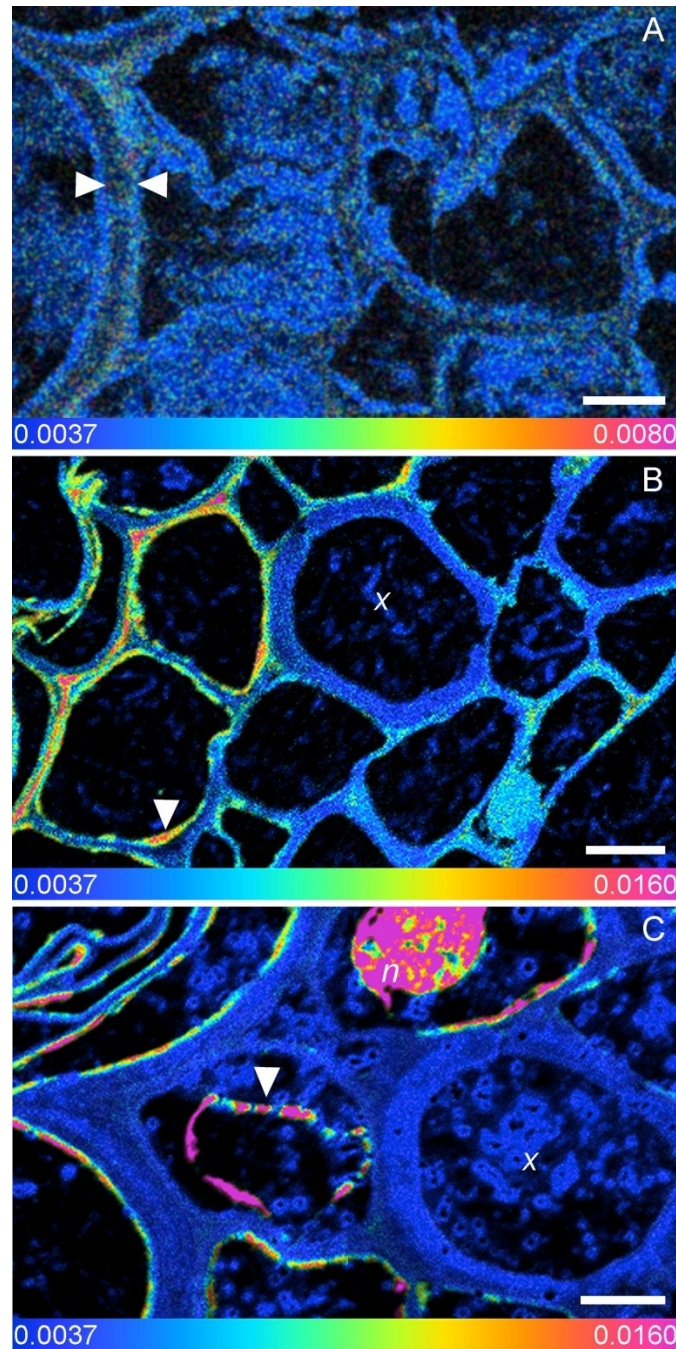

**Fig. S4** NanoSIMS imaging and analysis of plant roots *in situ* within the embedded soil core after exposure to  $^{15}\text{N}$ -labelled glutamate uptake. A) 5 min where the plant has a small amount of  $^{15}\text{N}$  enrichment in between cell walls (between arrows), B) 30 min where the  $^{15}\text{N}$  can be seen moving between the cell walls and in the cell cytoplasm (arrow) and C) 24 h where the  $^{15}\text{N}$  is mainly in the cell cytoplasm (arrow) and the nucleus (n) having largely passed through the root. The xylem cells (x) remain unenriched at all times. Enrichment levels of  $^{15}\text{N}$  are shown as  $^{15}\text{N}/^{14}\text{N}$  Hue Saturation Intensity (HSI) images. The HSI color scale is optimised to show  $^{15}\text{N}$  uptake in each image. Scale bar = 5  $\mu\text{m}$  for all images.

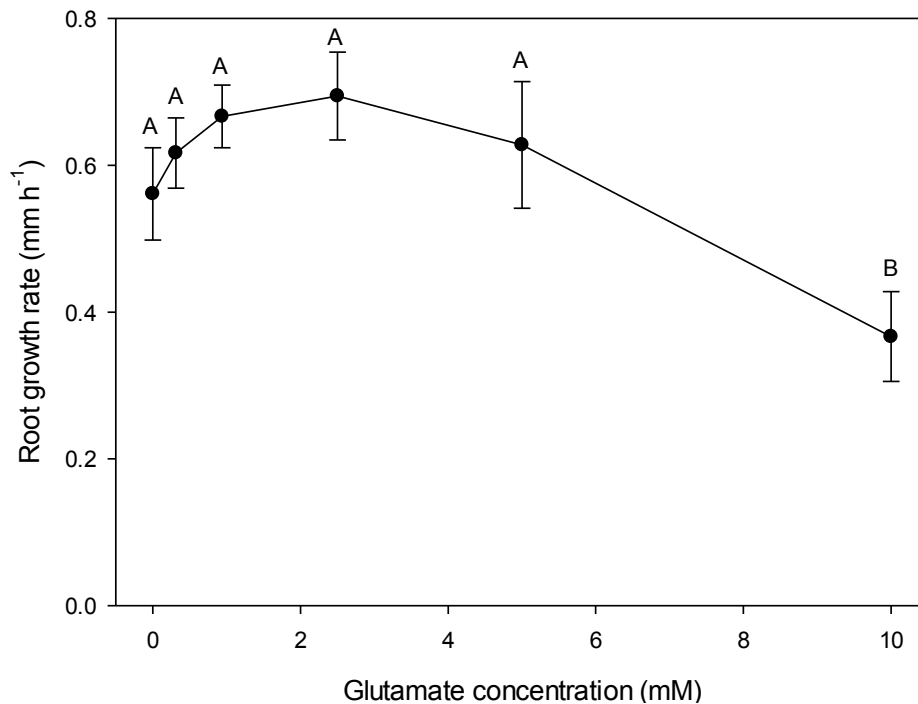

**Fig. S5** Influence of external solution glutamate concentration on the growth rate of wheat roots exposed to various concentrations of glutamate for 24 h. Plants (7 d old) were grown in hydroponic culture at 20°C with a 16 h photoperiod. Alongside various concentrations of K-glutamate, the root bathing solution contained CaCl<sub>2</sub> (1 mM), KCl (1 mM) and the initial pH was adjusted to pH 6.0 with HCl. Values represent means ± SEM (*n* = 9). Different capital letters above the symbols represent significant differences between the concentrations at the *P* < 0.05 level. ANOVA result, *P* = 0.007. We conclude from this experiment that exogenously applied glutamate at concentrations <5 mM are not toxic to root growth over short time periods. It is therefore unlikely that the pulse addition of <sup>15</sup>N-glutamate used in our experiment (3 mM) caused any major impact on root growth.
